# Supplementary material
Source: MDPI journal article supplement (https://www.mdpi.com/2035-8377/15/3/71)
Supplement: s1 [file s1]

**Table S1.** Selected parameters.

| Selected Parameter | Description                                                                                                                                                                                                     |
|--------------------|-----------------------------------------------------------------------------------------------------------------------------------------------------------------------------------------------------------------|
| Mean RRI           | RR intervals in milliseconds, ms                                                                                                                                                                                |
| SDNN               | Mean standard deviation of all normal RR intervals, ms                                                                                                                                                          |
| RMSSD              | Square root of the mean of squared differences between successive beat intervals, ms)                                                                                                                           |
| pNN50              | percentage of adjacent NN intervals differing by more than 50 ms/ percentage of adjacent NN intervals differing by more than 50 ms ,%),                                                                         |
| SDNN index         | Mean of the standard deviations of all NN intervals for all 5-min segments, ms                                                                                                                                  |
| SDANN              | Standard deviation of the averages of NN intervals in all 5-min segments, ms                                                                                                                                    |
| LF                 | Low frequency, ms <sup>2</sup> and normalized units, nu                                                                                                                                                         |
| HF                 | High frequency, ms <sup>2</sup> and normalized units, nu                                                                                                                                                        |
| LF/HF              | Index of sympathovagal balance                                                                                                                                                                                  |
| LF/HF-RR           | Low frequency to high frequency ratio of HRV                                                                                                                                                                    |
| PSD of HRV.        | Power spectral density, ms <sup>2</sup>                                                                                                                                                                         |
| BRS                | Baroreflex sensitivity calculated as the slope of the regression between spontaneous sequences of blood pressure changes and simultaneously occurring variations of RR intervals, ms/mmHg using sequence method |
| Valsalva ratio     | Ratio of the longest R-R interval after the Valsalva maneuver to the shortest interval during the maneuver),                                                                                                    |
| E/I ratio          | Expiration/inspiration ratio the longest R-R interval during inspiration),                                                                                                                                      |
| HR                 | Heart rate, 1/min                                                                                                                                                                                               |
| sBP                | Systolic blood pressure, mmHg                                                                                                                                                                                   |
| dBp                | Diastolic blood pressure, mmHg                                                                                                                                                                                  |
| mBP                | Mean blood pressure, mmHg                                                                                                                                                                                       |

References [8–15] are cited in main text

# Supplementary File S2

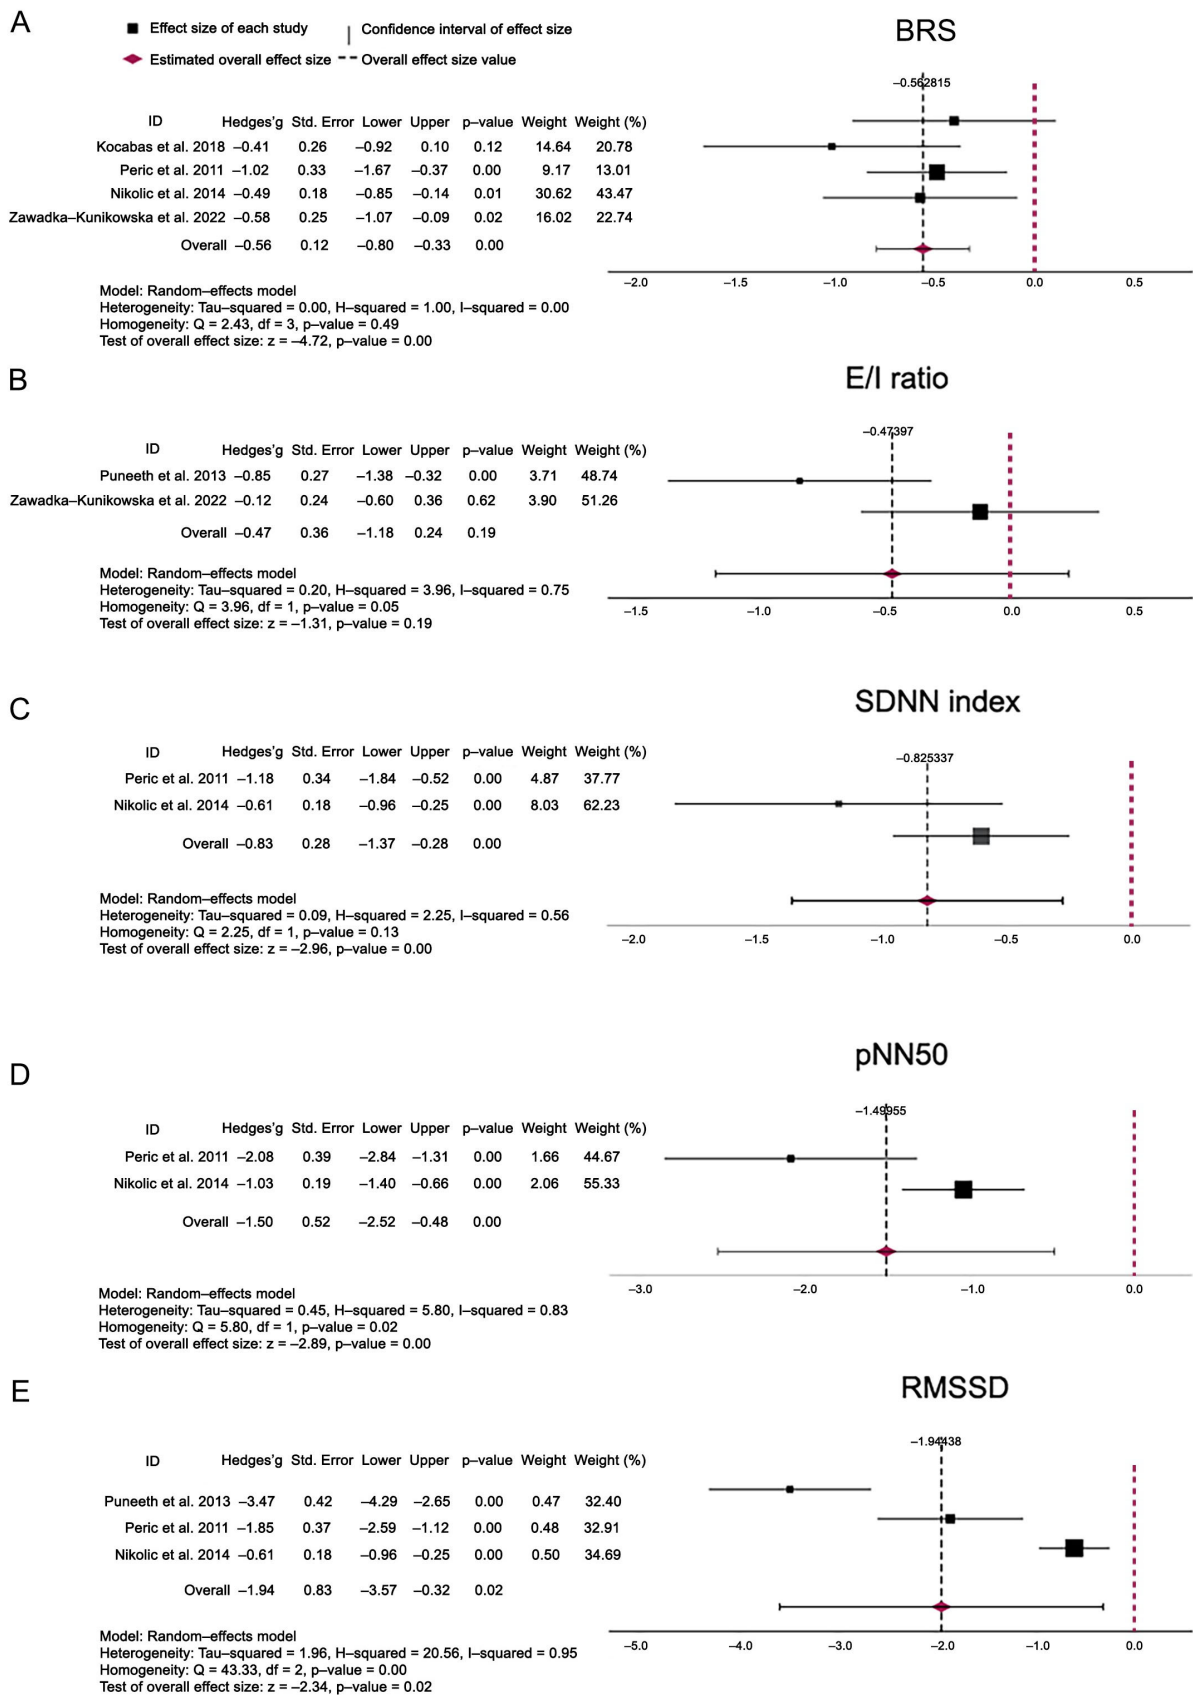

**Figure S1.** Baroreflex sensitivity, BRS (A) [8-11]; expiration/inspiration ratio, E/I (B) [11,13]; Mean of the standard deviations of all NN intervals for all 5 min segments, SDNN index (C) [8,9]; Number of pairs

of adjacent NN intervals differing more than 50 ms divided by the total number of all NN intervals, pNN50 (D) [8,9]; Square root of the mean of squared differences between successive beat intervals, RMSSD (E) [8,9,13]. References are cited in main text

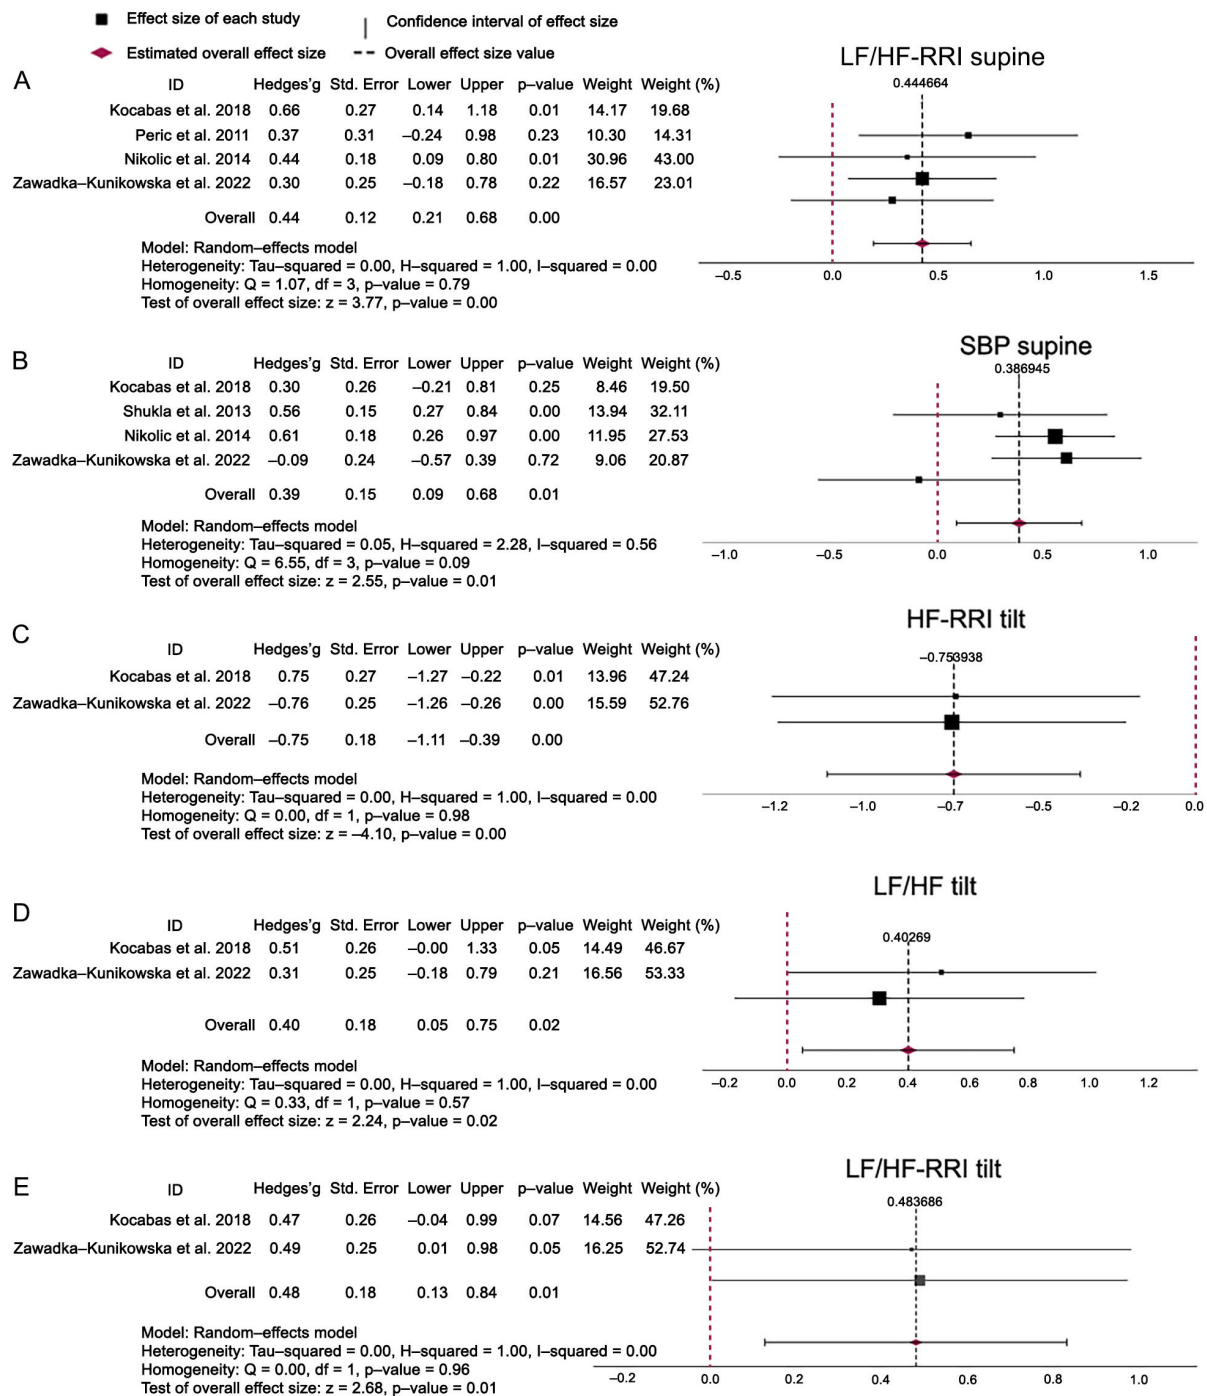

**Figure S2.** Low frequency to high frequency ratio of HRV, LF/HF-RRI (A) [8-11]; Systolic blood pressure, SBP (B)[8,10-12]; High frequency of HRV, HF-RRI (C) [10,11]; index of sympathovagal balance LF/HF<sub>tilt</sub> (D) [10,11]; Low frequency to high frequency ratio of HRV LF/HF-RRI<sub>tilt</sub> (E) [10,11]. References are cited in main text
